# Supplementary material for: Fungal endophyte infection of ryegrass reprograms host metabolism and alters development
Source: PubMed Central journal article supplement (PMC5049663; doi:10.1111/nph.13614), 2015-08-25
Supplement: NPH-208-1227-s001.pdf [file NPH-208-1227-s001.pdf]

## ***New Phytologist* Supporting Information**

Article title: **Fungal endophyte infection of ryegrass reprograms host metabolism and alters development**

Authors: Pierre-Yves Dupont, Carla J. Eaton, Jason J. Wargent, Susanne Fechtner, Peter Solomon, Jan Schmid, Robert C. Day, Barry Scott and Murray P. Cox

Article acceptance date: 18 July 2015

The following Supporting Information is available for this article:

### **Fig. S1 Effects of endophyte infection on the tetrapyrrole biosynthetic pathway**

**A.** Schematic representation of the tetrapyrrole biosynthetic pathway (Moulin & Smith, 2005), with red text/arrows indicating the positions of down-regulated genes. GlnRS, glutaminyl-tRNA synthetase; PBGD, porphobilinogen deaminase; UROS, uroporphyrinogen III synthase; UROD, uroporphyrinogen III decarboxylase; CPOX, coproporphyrinogen oxidase; PPOX, protoporphyrinogen oxidase; MgCh, magnesium chelatase; FeCh, ferrochelatase; HO, haem oxygenase; PΦS, phytychromobilin synthase; SirB, sirohydrochlorin ferrochelatase. **B.** Graph showing difference in photosynthetic rate per dry weight ( $\mu\text{mol CO}_2 \text{ m}^{-2} \text{ s}^{-1}$ ) between endophyte-infected and uninfected plants. Bars represent mean  $\pm$  SEM. Statistical significance was determined using an unpaired *t*-test (\*,  $0.05 \geq P > 0.01$ ).

A

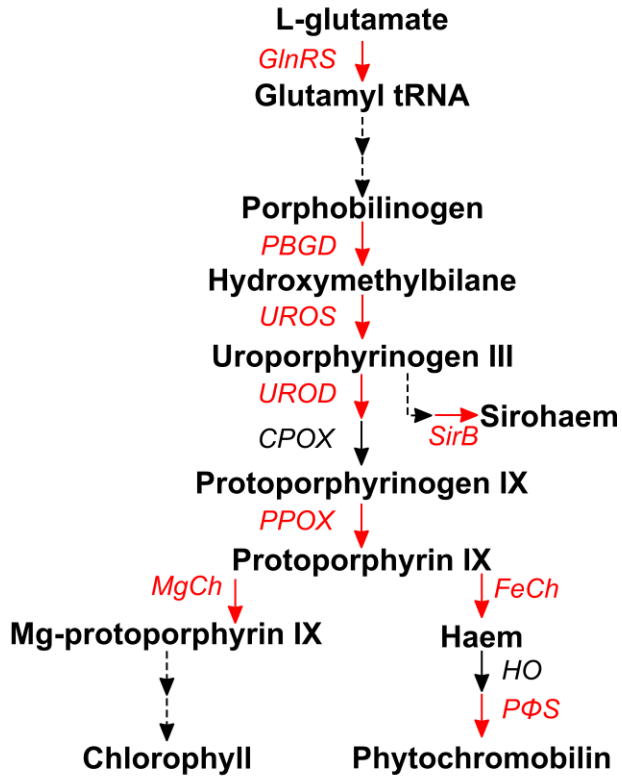

B

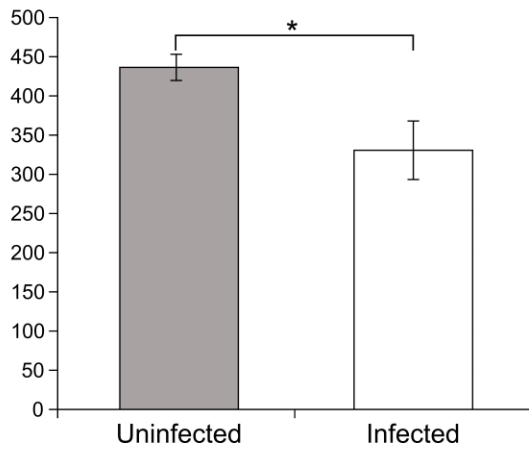

**Fig. S2 Endophyte infection up-regulates the abscisic acid biosynthetic pathway**

**(a)** Pathway schematic showing changes in expression of key genes in the abscisic acid biosynthetic pathway (Schwartz *et al.*, 2003). Coloured arrows are indicative of gene expression changes. Green arrow, up-regulated in infected plants; red arrow, down-regulated in infected plants. ZEP, zeaxanthin epoxidase; VDE, violaxanthin de-epoxidase; NSY, neoxanthin synthase; NCED, 9-cis-epoxycarotenoid dioxygenase; ABA2, abscisic acid 2; AAO, abscisic aldehyde oxidase; MoCo, molybdenum cofactor. **(b)** Graph showing difference in stomatal conductance (g/fresh weight) between endophyte-infected and uninfected plants. Bars represent mean  $\pm$  SEM. Statistical significance was determined using an unpaired *t*-test (\*\*,  $0.01 \geq P > 0.001$ ).

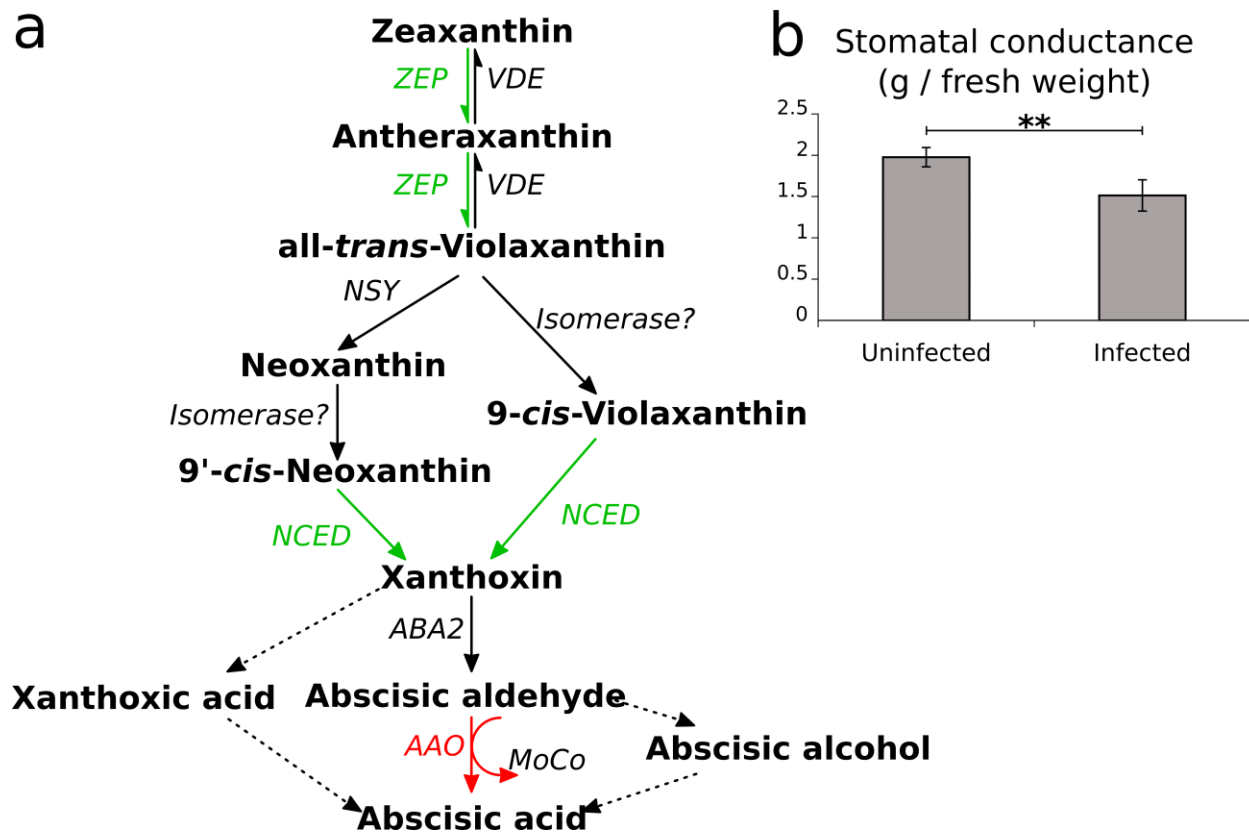

**Fig. S3 Endophyte infection up-regulates the phenylpropanoid biosynthetic pathway**

Pathway schematic showing changes in expression of key genes in the phenylpropanoid biosynthetic pathway (Peng *et al.*, 2008). Coloured arrows are indicative of gene expression changes. Green arrow, up-regulated in infected plants; red arrow, down-regulated in infected plants. CM, chorismate mutase; PAT, prephenate amino transferase; ADT, arogenate dehydratase; ADH, arogenate dehydrogenase; Trp, tryptophan; Tyr, tyrosine; Phe, phenylalanine; PAL, phenylalanine ammonia lyase; C4H, cinnamic acid 4-hydroxylase; 4CL,  $\rho$ -coumaroyl-CoA synthase; CHS, chalcone synthase; CHI, chalcone-flavanone isomerase; F3H, flavanone 3-hydroxylase; DFR, dihydroflavonol 4-reductase; LDOX, leucoanthocyanidin dioxygenase; AGT, anthocyanin glycosyltransferase; ACT, acyltransferase; FLS, flavonol synthase; HCT, hydroxycinnamoyl-CoA:skimimate/quinate hydroxycinnamoyltransferase; CCR, cinnamoyl-CoA reductase; CAD, cinnamyl alcohol dehydrogenase; C3H,  $\rho$ -coumarate 3-hydroxylase; CCoAOMT, caffeoyl-CoA 3-O-methyltransferase; COMT, caffeic acid O-methyltransferase.

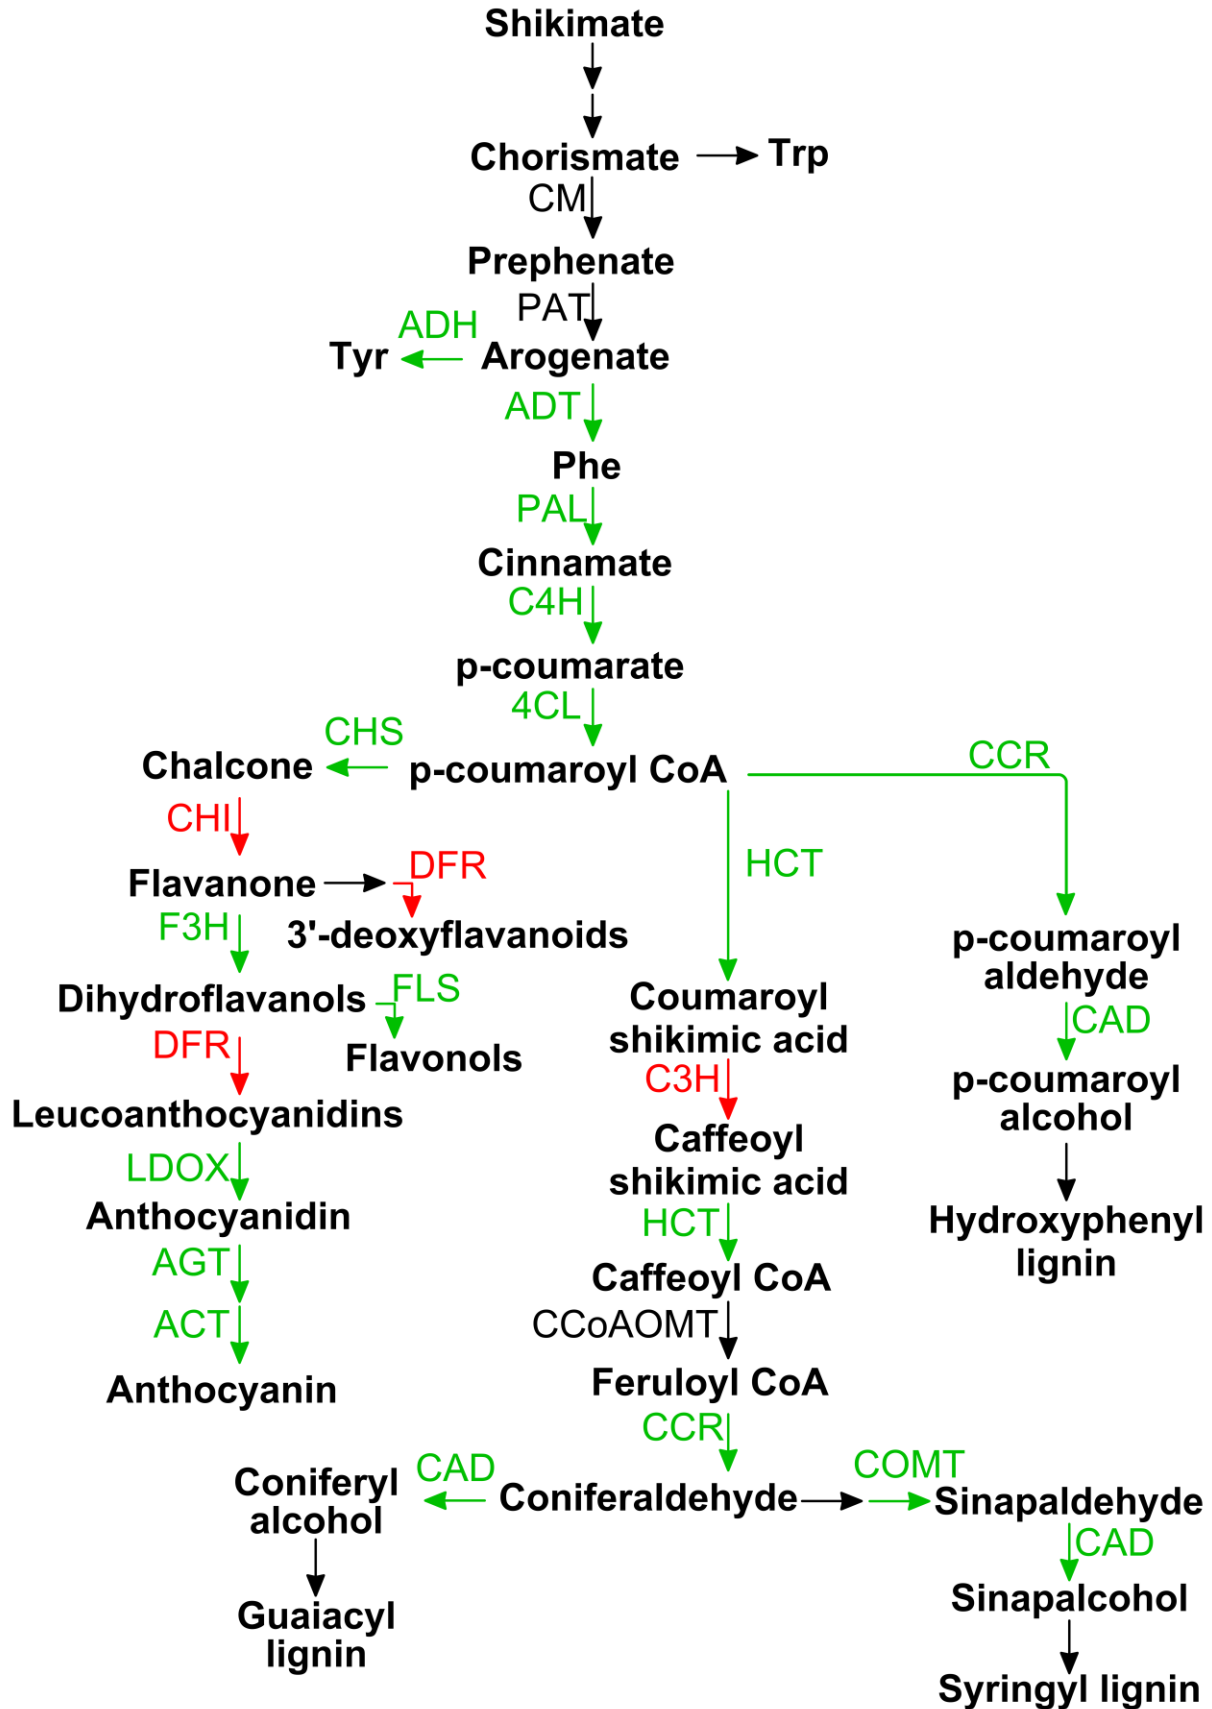

## References

**Moulin M, Smith A. 2005.** Regulation of tetrapyrrole biosynthesis in higher plants. *Biochemical Society Transactions* **33**: 4–7.

**Peng M, Hudson D, Schofield A, Tsao R, Yang R, Gu H, Bi Y-M, Rothstein SJ. 2008.** Adaptation of *Arabidopsis* to nitrogen limitation involves induction of anthocyanin synthesis which is controlled by the NLA gene. *Journal of Experimental Botany* **59**: 2933–2944.

**Schwartz S, Qin X, Zeevaart J. 2003.** Elucidation of the indirect pathway of abscisic acid biosynthesis by mutants, genes, and enzymes. *Plant Physiology* **131**: 1591–1601.

**Tables S1–S21 – see separate Excel files**

**Table S1** Results of the automatic annotation of the ryegrass ORFs

**Table S2** Number of up-regulated and down-regulated genes for all pathways described in Mercator

**Table S3** Comparison of Nanostring and RNAseq ratios

**Table S4** Annotations of the genes predicted to encode for enzymes involved in RNA metabolism (RNA transcription, regulation of transcription, RNA processing)

**Table S5** Annotations of the genes predicted to encode for enzymes involved in nucleotide metabolism

**Table S6** Annotations of the genes predicted to encode for enzymes involved in protein degradation, cell cycle, DNA synthesis and DNA repair

**Table S7** Annotations of the genes predicted to encode for enzymes involved in the TCA cycle and glycolysis

**Table S8** Annotations of the genes predicted to encode for enzymes involved in cell organisation

**Table S9** Annotations of the genes predicted to encode for enzymes involved in protein targeting, transport and vesicle transport

**Table S10** Annotations of the genes predicted to encode for enzymes involved in major carbohydrate metabolism and lipid metabolism

**Table S11** Annotations of the genes predicted to encode for enzymes involved in signalling (light, G-protein and phosphoinositide)

**Table S12** Annotations of the genes predicted to encode for enzymes involved in tetrapyrrole synthesis and photosynthesis

**Table S13** Annotations of the genes predicted to encode for enzymes involved in cell wall metabolism

**Table S14** Annotations of the genes predicted to encode for enzymes involved in hormone metabolism

**Table S15** Annotations of the genes predicted to encode for enzymes involved in secondary metabolism

**Table S16** Annotations of the genes predicted to encode for enzymes involved in degradation of xenobiotics

**Table S17** Annotations of the genes predicted to encode for enzymes involved in abiotic stress responses

**Table S18** Annotations of the genes predicted to encode for enzymes involved in biotic stress

responses

**Table S19** Results of the metabolomic analysis of the apoplastic fluid by GC-MS

**Table S20** Annotations of the genes predicted to encode for enzymes involved in redox reactions

**Table S21** Annotations of the genes predicted to encode for enzymes involved in callose and endo-1,3-beta glucosidase synthesis
